# Supplementary material
Source: publisher figshare collection journal article supplement (https://acs.figshare.com/ndownloader/files/4118446)
Supplement: Supplementary file 1 [file 4118446]

# Supporting Information

## Dynamic Swelling of Tunable Full-Color Block Copolymer Photonic Gels via Clicking Counterions

*Ho Sun Lim<sup>1</sup>, Jae-Hwang Lee<sup>1,2</sup>, Joseph J. Walsh<sup>1</sup>, and Edwin L. Thomas<sup>1,2\*</sup>*

<sup>1</sup>*Department of Materials Science and Engineering, Institute for Soldier Nanotechnologies, Massachusetts Institute of Technology, Cambridge, MA 02139 United States*

<sup>2</sup>*Department of Mechanical Engineering and Materials Science, Rice University, Houston, Texas 77251, United States, E-mail: elt@rice.edu*

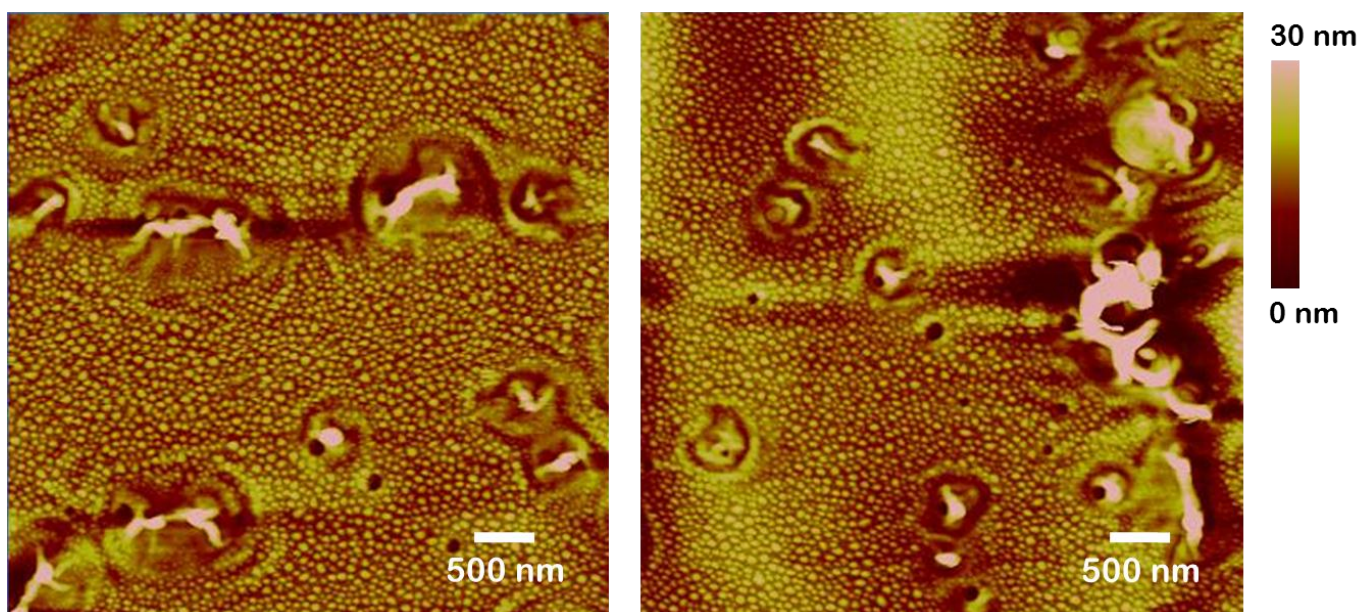

**Figure S1.** AFM height image of the PS-*b*-QP2VP photonic gels quaternized for 36 h.

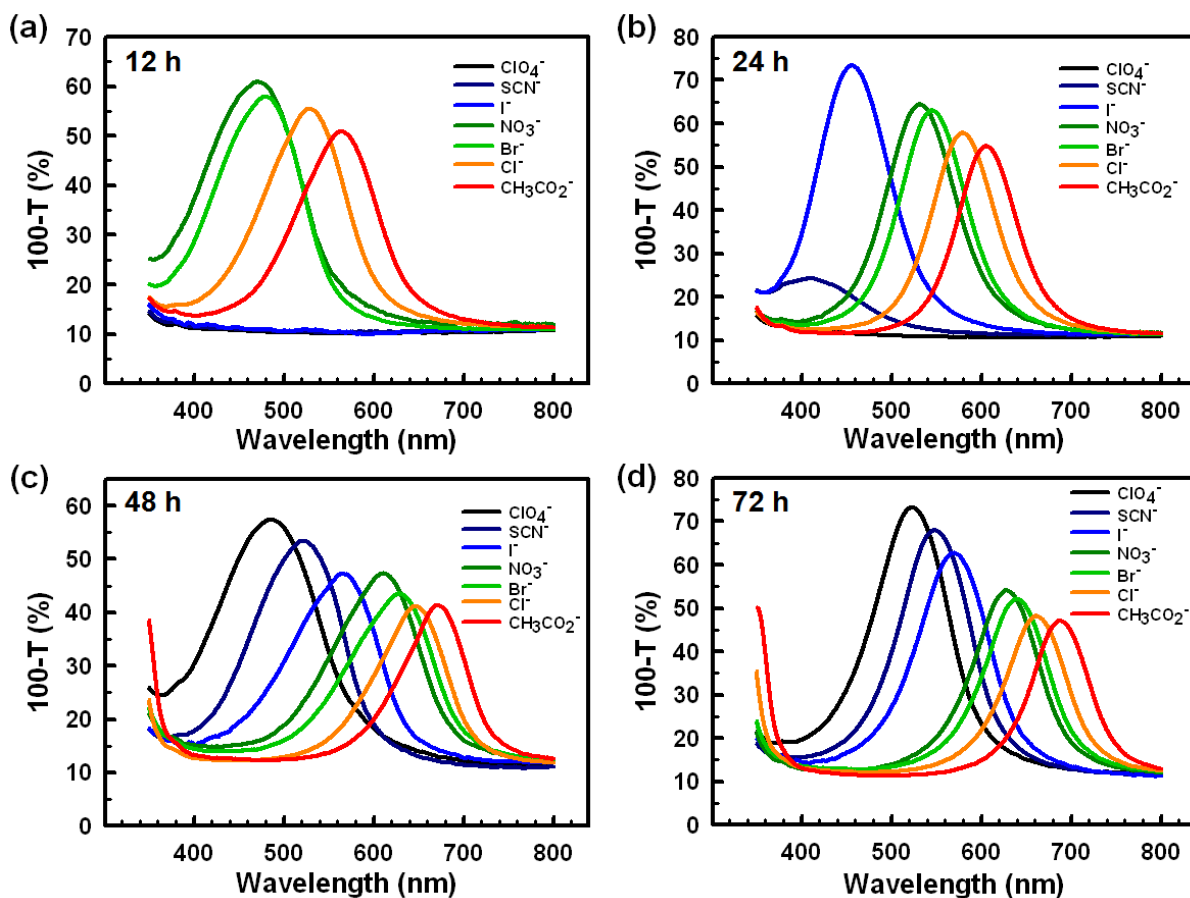

**Figure S2.** Reflectivity spectra of the PS-*b*-QP2VP photonic gels quaternized for (a) 12 h, (b) 24 h, (c) 48 h, and (d) 72 h as a result of direct ion-exchange.

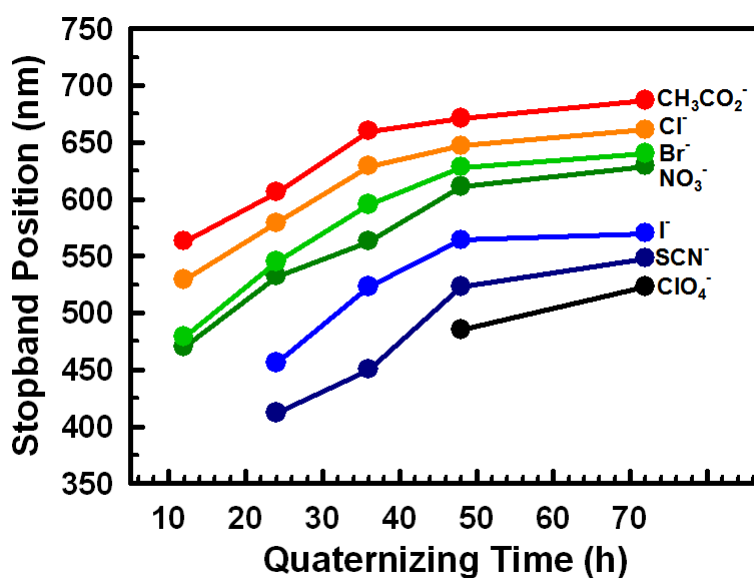

**Figure S3.** Tunability of photonic stop band position as a function of quaternizing time.

**Table S1.** Swelling degree of the QP2VP domains by TMM calculation

|                            | 12h                 |        | 24h                 |        | 36h                 |        | 48h                 |        | 72h                 |        |
|----------------------------|---------------------|--------|---------------------|--------|---------------------|--------|---------------------|--------|---------------------|--------|
|                            | $T_{QP2VP}$<br>(nm) | ratio% |
| $\text{ClO}_4^-$           | -                   | -      | -                   | -      | -                   | -      | 148                 | 617.5  | 163                 | 677.1  |
| $\text{SCN}^-$             | -                   | -      | 121                 | 505.0  | 135                 | 563.8  | 163                 | 677.1  | 172                 | 715.4  |
| $\text{I}^-$               | -                   | -      | 136                 | 568.2  | 163                 | 677.1  | 178                 | 740.0  | 180                 | 749.2  |
| $\text{NO}_3^-$            | 143                 | 594.2  | 165                 | 687.3  | 178                 | 739.6  | 195                 | 812.9  | 202                 | 842.1  |
| $\text{Br}^-$              | 146                 | 608.3  | 170                 | 709.2  | 190                 | 789.4  | 201                 | 838.8  | 206                 | 856.3  |
| $\text{Cl}^-$              | 165                 | 685.8  | 182                 | 759.9  | 202                 | 842.1  | 209                 | 868.8  | 214                 | 890.4  |
| $\text{CH}_3\text{CO}_2^-$ | 177                 | 738.8  | 192                 | 800.0  | 214                 | 890.4  | 217                 | 905.6  | 223                 | 930.2  |

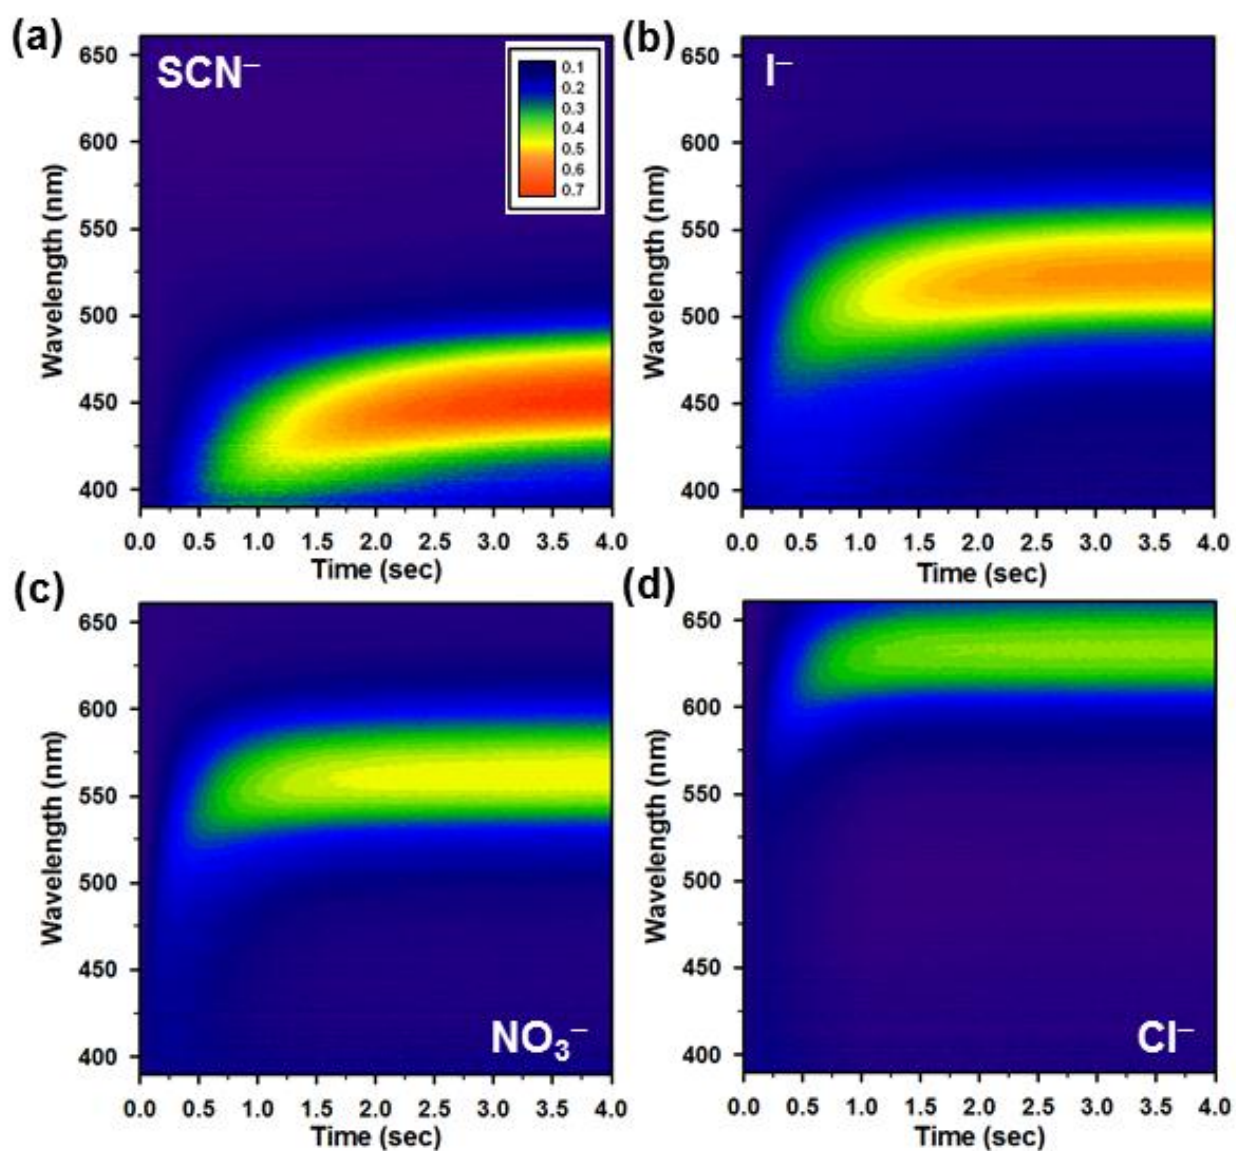

**Figure S4.** *In-situ* swelling behavior of photonic lamellar gels with various counteranions; (a)  $\text{SCN}^-$ , (b)  $\text{I}^-$ , (c)  $\text{NO}_3^-$ , and (d)  $\text{Cl}^-$  ions.

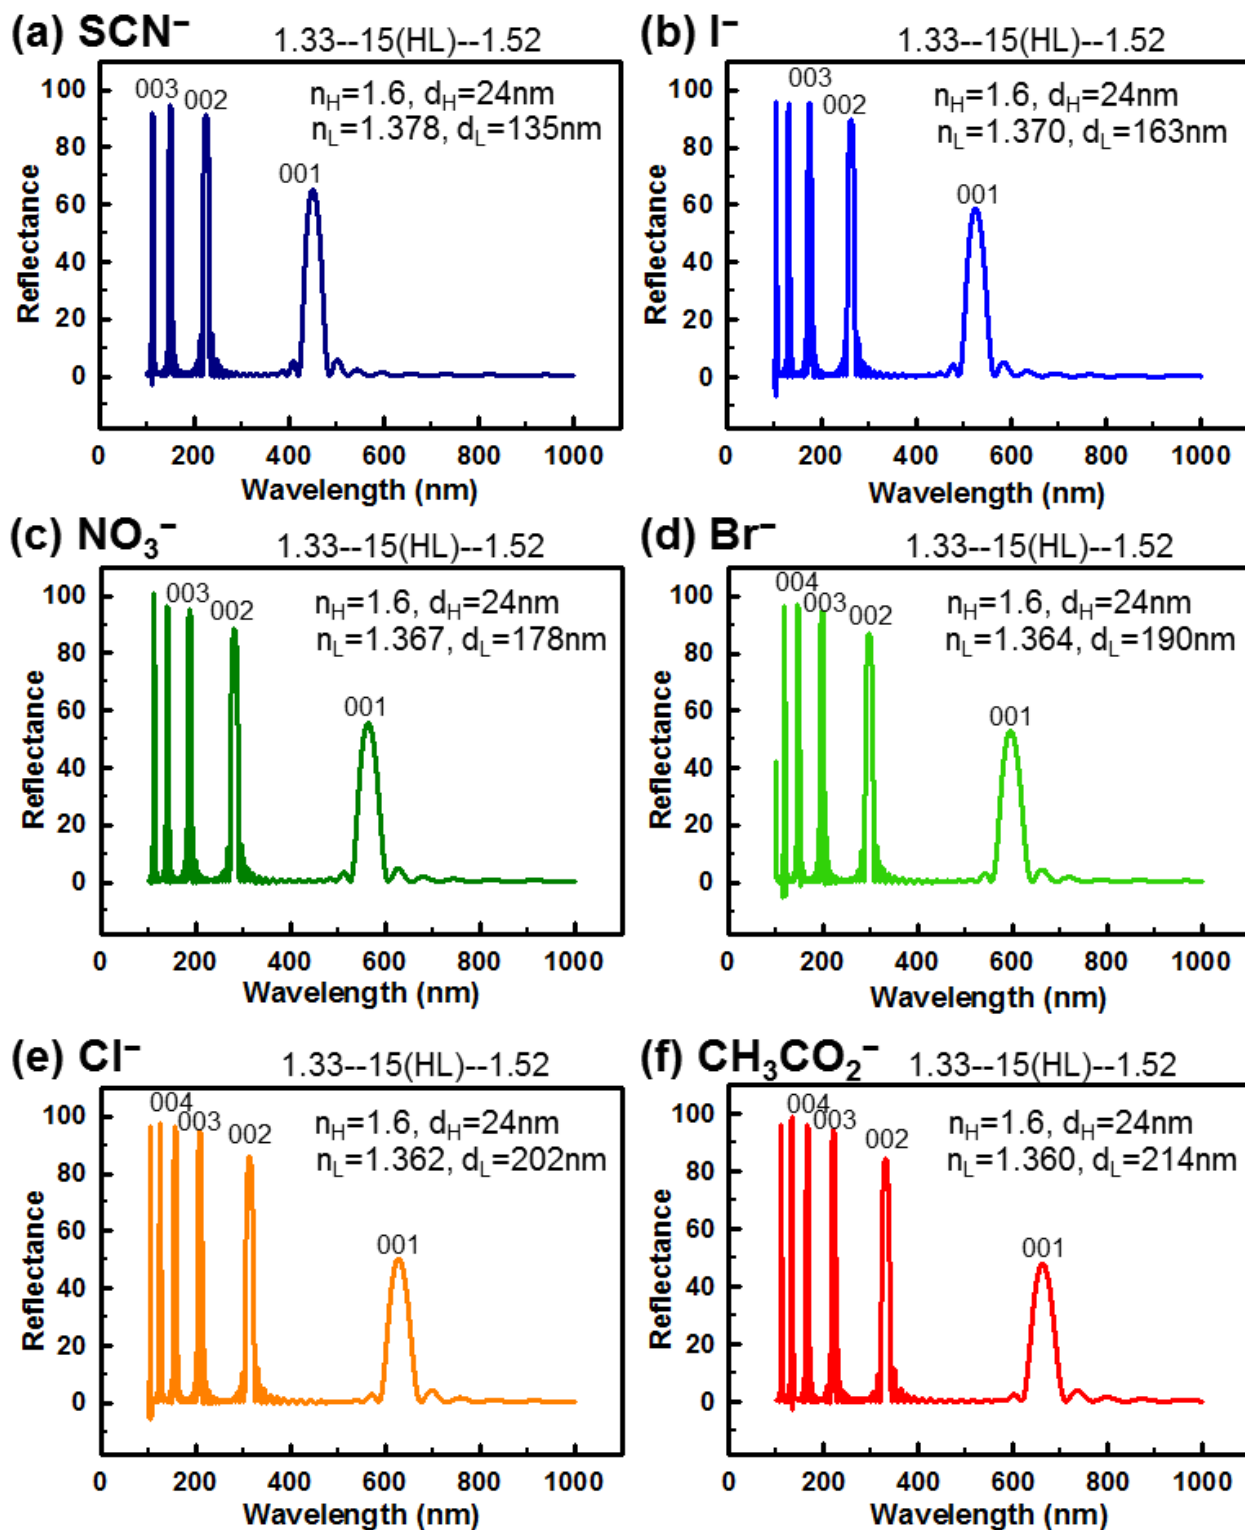

**Figure S5.** Calculated reflectance spectra using the transfer matrix model. The refractive index of QP2VP was scaled to a simple rule of mixtures based on water content of the QP2VP layers. The thickness of QP2VP was also scaled as a function of a fraction of water based on the assumption of uniaxial expansion of layers by swelling. The PS layers remain fixed during swelling.
